# Supplementary material
Source: MDPI journal article supplement (https://www.mdpi.com/1424-2818/14/7/539)
Supplement: s1 [file s1]

---

**Supplementary material: 200 news stories - information**

9News. What happens when nature and cities collide. 11.27.2021. Available online: <https://www.9news.com.au/world/andrew-budziak-incredible-photos-show-what-happens-when-nature-and-cities-collide/793e9bac-14f5-4e32-bae7-8208ee7026d5> Accessed on 12.10.2021.

Adams, D. Urban wildlife: Problems arise with rising number of local deer, geese. 4.18.2021. Montana Standard. Available online:

[https://mtstandard.com/news/local/urban-wildlife-problems-arise-with-rising-number-of-local-deer-geese/article\\_4fac863d-3575-550c-9a5b-d785d0913f7b.html](https://mtstandard.com/news/local/urban-wildlife-problems-arise-with-rising-number-of-local-deer-geese/article_4fac863d-3575-550c-9a5b-d785d0913f7b.html) Accessed on 12.10.2021.

Addison, B. Frisco residents report 32 bobcat and coyote sightings in past 30 days. 12.21.2021. The Dallas Morning News. Available

online:

<https://www.dallasnews.com/news/environment/2021/12/21/frisco-residents-report-32-bobcat-and-coyote-sightings-in-past-30-days/> Accessed on 12.30.2021.

AFP. Hyenas maul two people near Kenya's capital Nairobi. 12.28.2021. Available online: <https://www.yahoo.com/news/hyenas-maul-two-people-near-110438752.html> Accessed on 12.30.2021.

Alsharif, G. Coyote sightings on the rise on GTA school property: 'They're getting more comfortable'. 3.30.2022. Toronto Star.

Available

online:

<https://www.thestar.com/news/gta/2022/03/30/coyote-sightings-on-the-rise-on-gta-school-property-theyre-getting-more-comfortable.html> Accessed on 4.5.2022.

Altenhofen, G. Fowl play in West Des Moines: Territorial tom turkeys hold up traffic, menace pedestrians. 3.28.2022. Des Moines

Register.

Available

online:

<https://www.desmoinesregister.com/story/news/2022/03/28/west-des-moines-turkeys-hold-up-traffic-tips-to-avoid-turkeys-animal-control-iowa-dnr/7158969001/> Accessed on 4.5.2022.

Airgood, B. Meridian Township looks to cull about 200 deer as part of deer management program. 12.28.21. Lansing State Journal. Available online:

<https://www.lansingstatejournal.com/story/news/2021/12/28/meridian-twp-deer-cull-200-parks-land-preserves-private-property/9033895002/> Accessed on 12.30.2021.

Alanis, K. Raining fish in Texas? Here's what is behind this unusual animal phenomenon. 1.1.2022. Star Telegram. Available online:

<https://www.star-telegram.com/news/nation-world/national/article256938007.html> Accessed on 1.20.2022.

Ankel, S. Watch a raven attack a delivery drone from Google's sister company, forcing it to suspend some deliveries in Australia. 9.29.2021. Available online:

<https://www.businessinsider.com/watch-australias-google-delivery-drone-attacked-by-raven-mid-air-2021-9> Accessed on 12.30.2021.

Antes, E. & Imbler, S. Is the Coronavirus in Your Backyard? 2.7.2022. The New York Times. Available online: <https://www.ny-times.com/2022/02/07/health/coronavirus-deer-animals.html> Accessed on 2.10.2022.

AP. Miami agrees to do something about its peacock problem. 2.2.2022. Available online: <https://www.yahoo.com/news/miami-agrees-something-peacock-problem-134617718.html> Accessed on 2.10.2022.

AP. L.A. groundbreaking set for world's largest wildlife crossing over 101 Fwy 3.25.2022. KTLA. Available online: <https://ktla.com/news/local-news/groundbreaking-set-for-worlds-largest-wildlife-crossing-over-101-fwy-near-l-a/> Accessed on 4.5.2022.

Áriz, M. La cantante colombiana relata su lucha con los animals, que le 'robaron' su teléfono móvil. Noticias de Navarra, 9.29.2021. Available online: <https://www.noticiasdenavarra.com/vivir-on/gente/2021/09/29/shakira-enfrenta-jabalies-llevan-bolso/1185726.html> Accessed on 12.30.2021.

Armstrong, K. MKT wetlands project would serve trail users and benefit urban wildlife. 7.16.2021. Columbia Missourian. Available online: [https://www.columbiamissourian.com/news/local/mkt-wetlands-project-would-serve-trail-users-and-benefit-urban-wild-life/article\\_a9a93758-e4a5-11eb-bad3-f785b95489b5.html](https://www.columbiamissourian.com/news/local/mkt-wetlands-project-would-serve-trail-users-and-benefit-urban-wild-life/article_a9a93758-e4a5-11eb-bad3-f785b95489b5.html) Accessed on 12.30.2021.

Aswad, D. Aggressive turkeys in Wauwatosa chase animals, people. 2.9.2022. WISN 12 ABC. Available online: <https://www.wisn.com/article/aggressive-tosa-turkeys-chase-animals-people/39029008#> Accessed on 2.20.2022.

Banov, J. Raleigh police find owner of stray white-nosed coati. First, here's what it is. 2.15.2022. The News & Observer. Available online: <https://www.yahoo.com/news/raleigh-police-looking-owner-stray-005049078.html> Accessed on 2.20.2022.

Baraniuk, C. The strange reason migrating birds are flocking to cities. 2.20.2022. BBC. Available online: <https://www.bbc.com/future/article/20220217-the-strange-reason-migrating-birds-are-flocking-to-cities> Accessed on 2.22.2022.

Barron, A. M. Coyote confirmed to be living on Staten Island: Here's what wildlife experts know. 3.4.2022. SILive. Available online: <https://www.silive.com/news/2022/03/coyote-confirmed-to-be-living-on-staten-island-heres-what-wildlife-experts-know.html> Accessed on 3.10.2022.

Bay City News. Bay Area Rattlesnake Sightings Reported Earlier Than Normal. 3.28.2022. Patch.com. Available online: <https://patch.com/california/martinez/bay-area-rattlesnake-sightings-reported-earlier-year> Accessed on 3.30.2022.

BBC. Wolf 'snatches pet kangaroo' from Belgium home. 12.25.2021. Available online: <https://www.bbc.com/news/world-europe-50912766> Accessed on 12.30.2022.

BBC. Iguanas fall from trees as cold snap hits Florida. 1.31.2021. Available online: <https://www.bbc.com/news/world-us-canada-60090861> Accessed on 2.4.2022.

Becker, A. Conservation group voices concern as plan to trap and kill ‘nuisance’ coyotes in Wauwatosa moves ahead. KESQ. Available online: <https://kesq.com/news/2022/01/10/conservation-group-voices-concern-as-plan-to-trap-and-kill-nuisance-coyotes-in-wauwatosa-moves-ahead/> Accessed on 2.4.2022.

Benton, B. Tennessee, Georgia wildlife officials warn of spring black bears on the move. 3.28.2022. Chattanooga Times Free Press.

Available online: <https://www.timesfreepress.com/news/local/story/2022/mar/28/wildlife-officials-warn-spring-black-bears-mo/565943/> Accessed on 3.30.2022.

Biswas, S. All That Breathes: The Indian brothers who heal birds dropping from the sky. 2.18.2022. BBC. Available online:

<https://www.bbc.com/news/world-asia-india-60329561> Accessed on 2.20.2022.

Bjorson, G. Family In South Africa Discovers Venomous Snake Slithering Through Their Christmas Tree. 12.15.2021. People. Available online: <https://people.com/pets/family-finds-venomous-snake-in-christmas-tree/> Accessed on 12.18.2021.

Bright, I. Elk move down to urban Idaho areas during winter. 1.12.2022. Idaho 6 News. Available online: <https://www.kivitv.com/news/elk-move-down-to-urban-idaho-areas-during-winter> Accessed on 1.14.2022.

Bryant, K. Spain’s Dreaded Hogs Have Attacked Shakira Now. 9.30.2021. Vanity Fair. Available online: <https://www.vani-tyfair.com/style/2021/09/feral-hogs-shakira-stole-bag> Accessed on 10.2.2022.

Campbell-Smith J. A viral coyote-badger video demonstrates the incredible complexity of nature. 2.14.2020. High Country News. Available online: <https://www.hcn.org/issues/52.4/wildlife-a-viral-coyote-badger-video-demonstrates-the-incredible-complexity-of-nature> Accessed on 11.2.2021.

Capron, M. Grizzly bear with cub charges at man running on Idaho trail, officials say. 7.9.2021. The Kansas City Star. Available online: <https://www.kansascity.com/news/nation-world/national/article252685478.html> Accessed on 11.2.2021.

Capron, M. Deer with its head stuck in a trash can lid is spotted in Colorado, photos show. 1.14.2022. The Kansas City Star. Available online: <https://www.kansascity.com/news/nation-world/national/article257338587.html> Accessed on 1.18.2022.

Capron, M. Deer with arrow in its side found wandering neighborhood in Washington, photos show. 2.11.2022. The Bellingham Herald. Available online: <https://www.yahoo.com/news/deer-arrow-side-found-wandering-162307389.html> Accessed on

2.14.2022.

Casaletto, L. 'It's heartbreaking': Scarborough family recovering after coyote attacks dog, chases girl on morning walk. 7.21.2021. City News. Available online: <https://toronto.citynews.ca/2021/07/21/coyote-attack-toronto-scarborough/> Accessed on 10.2.2021.

Casey, E. Three 'aggressive' turkeys in Wauwatosa have been captured and killed. 2.10.2022. Milwaukee Journal Sentinel. Available Online: <https://www.jsonline.com/story/communities/west/news/wauwatosa/2022/02/10/aggressive-wauwatosa-turkeys-killed-wisconsin-wildlife-services/6737087001/> Accessed on 2.18.2021.

BSC News. Hamiltonian undergoing treatment after being bitten by rabid bat. 3.28.2022. Available online: <https://www.cbc.ca/news/canada/hamilton/rabid-bat-bite-1.6400079> Accessed on 3.30.2021.

CBS Baltimore. 'It Was Like A Horror Movie': Pikesville Child Bitten By Raccoon. 12.24.2021. Available online: <https://baltimore.cbslocal.com/2021/12/24/it-was-like-a-horror-movie-pikesville-child-bitten-by-raccoon/> Accessed on 12.30.2021.

CBS News. Otters are mysteriously attacking people and dogs in Alaska's largest city: "Unusual behaviors". 9.21.2021. Available online: <https://www.cbsnews.com/news/otters-attacking-people-dogs-anchorage-alaska/> Accessed on 10.20.2021.

City News Service. 8.3.2021. City Applies For Emergency Closure Of La Jolla Sea Lion Rookery. KPBS. Available online: <https://www.kpbs.org/news/environment/2021/08/03/city-emergency-closure-la-jolla-sea-lion-rookery> Accessed on 9.15.2021.

Chang, R. Hotels in Venice Are Giving Guests Water Guns to Scare Off a Certain Pest — Yes, Really. 3.30.2022. Travel and Leisure. Available online: <https://www.travelandleisure.com/travel-tips/venice-hotels-are-supplying-guests-with-water-guns-to-ward-off-seagulls> Accessed on 4.3.2022.

Clayton, J. Urban Coyotes learn to live with us. 10.17.2021. Texas Public Radio. Available online: <https://www.tpr.org/environ-ment/2021-10-17/urban-coyotes-learn-to-live-with-us> Accessed on 11.30.2021.

Clucas, B. Life of a campus racoon. 10.30.2021. The Lumberjack. Available online: <https://thelumberjack.org/2021/10/30/life-of-a-campus-raccoon/> Accessed on 11.30.2021.

Cohen, R. The posh California suburb that declared itself a mountain lion habitat to block affordable housing is backing down after backlash. 2.7.2022. Insider. Available online: <https://www.yahoo.com/news/posh-california-suburb-declared-itself-183659946.html> Accessed on 2.10.2021.

Collins, L. M. Eagles, Beavers, Sea Turtles: Why N.Y.C. Is Humming With Wildlife. 10.28.2021. The New York Times. Available online: <https://www.nytimes.com/2021/10/28/nyregion/nyc-wildlife-habitats-animals.html> Accessed on 10.30.2021.

Coupal, B. Officer responding to report of wild chinchilla in Bridgewater closet captures flying squirrel. 1.11.2022. 7 News Boston. Available online: <https://whdh.com/news/officer-responding-to-report-of-wild-chinchilla-in-bridgewater-closet-captures-flying-squirrel/> Accessed on 1.13.2022.

Cyr, A. More coyotes are adapting to urban areas in Canada. Here's why they thrive in cities 1.2.2022. The Globe and Mail. Available online: <https://www.theglobeandmail.com/canada/article-more-coyotes-are-adapting-to-urban-areas-in-canada-heres-why-they/> Accessed on 1.10.2021.

Dalton, K.F. No solutions in sight as Staten Island's wild turkey problem reaches boiling point. 1.15.2022. Silive. Available at: <https://www.silive.com/news/2022/01/staten-islands-wild-turkey-problem-persists-as-officials-grapple-with-solution.html> Accessed on 1.17.2021.

Délano, A.C. Chonkerwar: The Great South Pacific, Passive-Aggressive Sea Lion Insurgency. 7.28.2021. Pajiba. Available online: <https://www.pajiba.com/miscellaneous/chonkerwar-the-great-south-pacific-passiveaggressive-sea-lion-insurgency.php> Accessed on 8.30.2021.

Diaz, G. Texas Ranked No. 1 in the US for Fatal Animal Attacks. 11.2.2021. Houstonia Mag. Available online: <https://www.housto-niamag.com/news-and-city-life/2021/11/texas-ranked-no-1-for-fatal-animal-attacks> Accessed on 12.3.2021.

Dill, C. An urban rat expert has a silver bullet for rodent control. 2.10.2022. Axis. Available online: <https://www.axios.com/lo-cal/washington-dc/2022/02/10/rat-expert-dc-rat-problem> Accessed on 2.15.2022.

Eady, A. Watch: Mama duck delivers 10 babies at Jacksonville Beach hospital, staff escorts them out building. 3.24.2022. CBS47. Available online: <https://www.yahoo.com/news/watch-mama-duck-delivers-10-130634621.html> Accessed on 3.30.2022.

Ehrlich, B. These Ducks Visit Dee Dee Ramone's Grave Every Day. 12.8.2021. Rolling Stone. Available online: <https://www.rollingstone.com/music/music-news/dee-dee-ramone-ducks-1268808/> Accessed on 12.16.2021.

El Periodico. Shakira, atacada por unos jabalíes: "Me han reventado todo". 9.29.2021. Available online: <https://www.elperi-odico.com/es/extra/20210929/shakira-ataque-jabalies-12126800> Accessed on 10.30.2021.

Erdrich, R. W. Rattling snakes - and teeth - at Friday's World's Largest Rattlesnake Roundup. 3.11.2022. The Abilene Reporter News. Available online: <https://www.yahoo.com/news/rattling-snakes-teeth-fridays-worlds-212104603.html> Accessed on 3.15.2022.

Escobar, A. Wild, hungry pigs still rampaging around Santa Ana River. 1.14.2022. The Press-Enterprise. Available online: <https://www.pe.com/2022/01/14/wild-hungry-pigs-still-rampaging-around-santa-ana-river/> Accessed on 1.15.2022.

Finke, E. Cities along the St. Joseph River share plans to deter geese. 3.29.2022. WSBT 22. Available online: <https://wsbt.com/news/local/cities-along-the-st-joseph-river-share-plans-to-deter-geese> Accessed on 3.30.2022.

Fiore, M. 'I lost a friend': Kenosha neighborhood mourns loss of 'Carl the Turkey'. 12.7.2021. CBS58. Available online: <https://www.cbs58.com/news/i-lost-a-friend-kenosha-community-mourns-loss-of-carl-the-turkey> Accessed on 12.15.2021.

Fitzsimons, T. Mountain lion tranquilized after chase in Orange County, Calif. 3.23.2022. NBC News. Available online: <https://www.yahoo.com/news/mountain-lion-tranquilized-chase-orange-185715128.html> Accessed on 3.25.2022.

Foulkes, I. Switzerland's wolves get too close for comfort. 12.24.2021. BBC. Available online: <https://www.bbc.com/news/world-europe-59738541> Accessed on 12.30.2021.

Fox, C. Toronto has seen a spike in residents being bitten or scratched by raccoons amid COVID-19 pandemic. 3.2.2021. CP 24. Available at: <https://www.cp24.com/news/toronto-has-seen-a-spike-in-residents-being-bitten-or-scratched-by-raccoons-amid-covid-19-pandemic-1.5330294> Accessed on 3.15.2022.

Fox 4 News. Medical examiner rules Hood County man died from animal attack. 1.27.2021. Available online: <https://www.fox4news.com/news/medical-examiner-rules-hood-county-man-died-from-animal-attack> Accessed on 1.28.2021.

Fox 5. Mountain lion or large predator blamed in farm animal deaths. 3.6.2021. Available online: <https://fox5sandiego.com/news/local-news/mountain-lion-or-large-predator-blamed-in-farm-animal-deaths/> Accessed on 3.15.2021.

Fox 35. Video shows deputies responding to woman after 911 call reporting bear attack. 1.14.22. Available online: <https://www.fox35orlando.com/news/video-shows-deputies-responding-to-woman-after-911-call-reporting-bear-attack> Accessed on 1.16.2021.

Francovich, E. Killed with kindness: Ignorant good Samaritans lead to deaths of two North Idaho moose. 2.16.2022. Idaho State-man. Available online: <https://www.yahoo.com/news/killed-kindness-ignorant-good-samaritans-120000274.html> Accessed on 2.20.2022.

Fretwell, S. Armadillos are marching across South Carolina. Be prepared to live with them. 1.3.2022. The State. Available online: <https://www.thestate.com/news/local/environment/article256942367.html> Accessed on 1.7.2022.

Gale, J. Delayed Wuhan Report Adds Crucial Detail to Covid Origin Puzzle. 8.16.2021. Bloomberg. Available online: <https://www.bloomberg.com/news/features/2021-08-17/where-did-covid-come-from-report-on-infected-wuhan-wild-animals-sheds-new-light> Accessed on 8.20.2021.

Gammon, K. 'Pretty awesome': celebrity mountain lion's walkabout excites Los Angeles residents. 3.9.2022. The Guardian. Available Online:

<https://www.yahoo.com/news/pretty-awesome-celebrity-mountain-lion-233345442.html> Accessed on 3.15.2022.

Garfella, C. Barcelona's wild boars didn't attack only Shakira. 10.1.2021. El País. Available online: <https://elpais.com/espana/catalu-nya/2021-10-01/los-jabalies-de-barcelona-no-solo-hostigan-a-shakira.html> Accessed on 10.3.2021.

Gilbert, A.C. '2021 is pulling out all the tricks': Fish rain from the sky in rare phenomenon in Texas. 1.1.2022. USA Today. Available online: <https://www.yahoo.com/news/2021-pulling-tricks-fish-rain-143441815.html> Accessed on 1.2.2022.

Gilmer, E.J. Flyby Ranks: Harvard's Urban Wildlife. 10.8.2021. The Crimson. Available online: <https://www.thecrimson.com/flyby/article/2021/10/8/flyby-ranks-urban-wildlife/> Accessed on 10.10.2021.

Gilson, P.J. Durham Region Is Warning Residents About Rabies After Increase In Wild Animal Attacks. 7.8.2021. Narcity. Available online: <https://www.narcity.com/wild-animal-attacks-has-durham-region-worries-about-rabies> Accessed on 7.10.2021.

Glusac, E. In the Heart of Winter, an Abundance of Wildlife. 2.8.2022. The New York Times. Available online: <https://www.ny-times.com/2022/02/08/travel/winter-wildlife-florida-hawaii.html> Accessed on 2.15.2022.

Goldberg, B. Discovery of Omicron in New York deer raises concern over possible new variants. 2.8.2022. Reuters. Available online: <https://www.yahoo.com/news/discovery-omicron-york-deer-raises-221014202.html> Accessed on 2.15.2022.

Goodkind, N. A superrich suburban neighborhood tried to become a mountain lion sanctuary to destroy more affordable housing. It didn't work. 2.8.2022. Fortune. Available online: <https://finance.yahoo.com/news/superrich-suburban-neighborhood-tried-be-come-182916477.html> Accessed on 2.15.2022.

Groman, J. Attacks by Urban Coyotes Are Rare, but Frightening. 2.18.2021. The New York Times. Available online: <https://www.nytimes.com/2020/01/09/science/chicago-coyote-attacks.html> Accessed on 2.19.2021.

Graham-McLay, C. New Zealand's Sea Lions Are Back, and Crashing Golf Courses and Soccer. 11.9.2021. The New York Times. Available online: <https://www.nytimes.com/2021/11/09/science/new-zealand-sea-lions.html> Accessed on 11.15.2021.

Hamdan, L. Why do affluent St. Louis areas host more wildlife? Blame the 'luxury effect'. 10.8.2021. St. Louis NPR. Available online: <https://news.stlpublicradio.org/show/st-louis-on-the-air/2021-10-08/why-do-affluent-st-louis-area-s-host-more-wildlife-blame-the-luxury-effect> Accessed on 10.10.2021.

Hanson, E. 'Alligator offered no resistance': Anderson police find python, alligator in a car during arrest. 2.8.2022. Redding Record Searchlight. Available online:

<https://www.yahoo.com/news/alligator-offered-no-resistance-anderson-021133836.html> Accessed on 2.15.2022.

Hanson, H. Man Thought Death Was Near As Otter Pack Overpowered Him In Singapore. 12.11.2021. Park HuffPost. Available online: [https://www.huffpost.com/entry/otter-attack-singapore\\_n\\_61b4bebce4b0bb13fd07ea66](https://www.huffpost.com/entry/otter-attack-singapore_n_61b4bebce4b0bb13fd07ea66) Accessed on 12.15.2021.

Helean, J. Report: Snowboarder collides with moose at Park City resort. 1.18.2021. Fox 13. Available online: <https://www.fox13now.com/news/local-news/report-snowboarder-collides-with-moose-at-park-city-resort> Accessed on 1.19.2021.

Hanson, H. A Hungry 500-Pound Bear Has Broken Into Nearly 30 Homes In California (UPDATE). 2.19.2022. HuffPost. Available online: <https://www.yahoo.com/news/hungry-500-pound-bear-broken-190230327.html> Accessed on 2.22.2022.

Haroun, A. A squirrel went on a vicious Christmas rampage in a Welsh town, attacking 18 residents and animals. 12.29.2021. Insider. Available online: <https://www.insider.com/squirrel-went-on-vicious-christmas-rampage-in-wales-attacking-18-2021-12> Accessed on 12.30.2021.

Higgins, C. Ankeny man spots mountain lion in his backyard. 1.8.2022. Des Moines Register. Available online: <https://www.yahoo.com/news/ankeny-man-spots-mountain-lion-113005284.html> Accessed on 1.15.2022.

Holder, S. How to Design a City for Sloths. 11.30.2021. Bloomberg. Available online: <https://www.bloomberg.com/news/articles/2021-11-30/fast-paced-urban-living-can-be-stressful-for-sloths> Accessed on 12.1.2021.

Hollyfield, A. Mountain lion spotted napping in backyard of Daly City home, startling residents. 9.28.2021. ABC 7. Available online: <https://abc7news.com/daly-city-mountain-lion-sighting-wild-animals-animal/11057141/> Accessed on 9.30.2021.

Hot 107.9. Buffalo Flings Man Across Restaurant – As Close to a ‘Bull in a China Shop’ as it Gets. 1.7.2022. Available online: <https://1079ishot.com/buffalo-restaurant-bull-china-shop-video/> Accessed on 1.8.2022.

Houghton, B. Toronto Squirrel Apparently Stole A 7-Eleven Taquito & It's More Iconic Than Pizza Rat. 1.14.2022. Narcity. Available online: <https://www.narcity.com/toronto/toronto-squirrel-apparently-stole-a-7-eleven-taquito-its-more-iconic-than-pizza-rat> Accessed on 1.15.2022.

Kraemer, S. Beloved Kenosha turkey dead, neighborhood mourns. 12.7.2021. Fox6. Available online: <https://www.fox6now.com/news/beloved-kenosha-turkey-dead-neighborhood-mourns> Accessed on 1.15.2022.

Hughes, R.A. Tourists Armed With Water Pistols To Fight Off Venice's Predatory Seagulls. 3.23.2022. Forbes. Available online: <https://www.forbes.com/sites/rebeccahughes/2022/03/23/tourists-armed-with-water-pistols-to-fight-off-venices-predatory-sea-gulls/?sh=4305425811d8> Accessed on 3.25.2022.



Hutton, A. How wild turkeys' rough and rowdy ways are creating havoc in US cities. 11.24.2021. The Guardian. Available online:

<https://www.theguardian.com/environment/2021/nov/24/wild-turkeys-us-cities-havoc-hunting> Accessed on 11.26.2021.

Imbler, S. Caring for the Wildlife That Stray Into the Suburbs. 7.20.2021. The New York Times. Available online: <https://www.nytimes.com/2021/07/20/science/suburbs-wildlife-deer-owls.html> Accessed on 7.28.2021.

Ivie, B. When animals attack, Arkansas edition. 7.28.2021. Arkansas Times. Available online: <https://arktimes.com/arkansasblog/2021/07/28/when-animals-attack-arkansas-edition> Accessed on 8.2.2021.

Jadala, S. Lethal bronzing disease killing cabbage palms all over Gainesville. 2.28.2022. The Gainesville Sun. Available online:

<https://www.yahoo.com/news/lethal-bronzing-disease-killing-cabbage-110047600.html> Accessed on 3.1.2022.

Jarvis, B. Deer Wars and Death Threats. 11.8.2021. The New Yorker. Available online: <https://www.newyorker.com/magazine/2021/11/15/deer-wars-and-death-threats> Accessed on 11.10.2021.

Jones, B. The animal that's everywhere and nowhere. 1.25.2022. Vox. Available online: <https://www.vox.com/22877353/axolotl-salamander-pet-extinction-mexico> Accessed on 1.26.2022.

Karlson, C.J. Urban Jungles? See Wildlife Moving Into 7 Cities Around The World. 11.25.2021. Worldcrunch. Available online:

<https://worldcrunch.com/green/why-are-wild-animals-entering-cities/video-of-boar-family-in-ro-me-neighborhood> Accessed on 11.27.2021.

Ke, B. Chinese man bitten by venomous snake he thought was dead inside a wine bottle he bought for his son. 3.23.2022. Next

Shark. Available online: <https://www.yahoo.com/news/chinese-man-bitten-venomous-snake-012430002.html> Accessed on 3.25.2022.

Kekatos, M. Omicron found in NYC deer raises questions about COVID transmission from animals to humans. 2.8.2022. ABC

News. Available online: <https://abcnews.go.com/US/scientists-find-1st-deer-infected-omicron-variant-york/story?id=82744120> Accessed on 2.10.2022.

KelownaNow. Plan to use crossbows to kill nuisance deer in Canadian town challenged by critics. 1.17.2022. Available online:

[https://www.kelownanow.com/news/news/National\\_News/Plan\\_to\\_use\\_crossbows\\_to\\_kill\\_nuisance\\_deer\\_in\\_Canadian\\_town\\_challenged\\_by\\_critics/](https://www.kelownanow.com/news/news/National_News/Plan_to_use_crossbows_to_kill_nuisance_deer_in_Canadian_town_challenged_by_critics/) Accessed on 1.19.2022.

KINY Radio. Wildlife biologist highlights urban bear issue in Sitka. 11.1.2021. Available online: <https://www.kinyra-dio.com/news/news-of-the-north/wildlife-biologist-highlights-urban-bear-issue-in-sitka/> Accessed on 11.15.2021.

Kong, S. AS HONG KONG SLAUGHTERS WILD BOARS, QUESTIONS OF BIODIVERSITY LOOM. Fair Planet. Available online:

<https://www.fairplanet.org/story/as-hong-kong-slaughters-wild-boars-questions-of-biodiversity-loom/> Accessed on 11.15.2021.

KTLA. Mom saves son, 5, during mountain lion attack, fights off animal with 'bare hands'. 8.29.2021. Available online: <https://kfor.com/news/mom-saves-son-5-during-mountain-lion-attack-fights-off-animal-with-bare-hands/> Accessed on 9.1.2021.

Kugler, K. Increasing the canopy: Bloomington to spend \$800,000 planting trees in 22 areas. 3.21.2022. The Herald Times. Available

online:

<https://www.yahoo.com/news/increasing-canopy-bloomington-spend-800-101745612.html> Accessed on 3.25.2022.

Kupfer, M. An aggressive squirrel has been taking a bite out of this eastern Ontario town. 3.17.2022. CBC. Available online:

<https://www.cbc.ca/news/canada/ottawa/carleton-place-squirrel-1.6385340> Accessed on 3.19.2022.

KWTX. Dead bat found at Central Texas elementary school tests positive for rabies. 3.25.2022. Available online:

<https://www.kwtx.com/2022/03/26/dead-bat-found-central-texas-elementary-school-tests-positive-rabies/> Accessed on 3.26.2022.

Labbé, S. What's with all these cougar attacks? 3.13.2021. TriCity News. Available online: <https://www.tricitynews.com/amp/local-news/whats-with-all-these-cougar-attacks-3542193> Accessed on 3.15.2021.

Lea, R. Bloodthirsty, 'Psycho' Squirrel Attacks 18 in Small Town Christmas Rampage. 12.29.2021. Newsweek. Available

online: <https://www.newsweek.com/bloodthirsty-psycho-squirrel-attacks-18-small-town-christmas-rampage-buckley-1664019> Accessed on 1.2.2022.

Lee, J. Big cat warning: Predators on the loose in Britain scavenging for food like urban foxes. Express. 1.1.2022. Available

online: <https://www.express.co.uk/news/uk/1543426/big-cat-warning-sighting-UK-predators-roam-Britain-scamenging-food-urban-foxes> Accessed on 1.2.2022.

Le Parisien. Taiwan touché par une invasion de crapauds-buffles, une espèce toxique. 12.7.2021. Available

online: <https://www.leparisien.fr/video/videotaiwantoucheeparuneinvasiondecrapaudsbufflesunespecetoxique071220216RSBUBTK4RG6RM5SW4BL4PXCPCQ.php> Accessed on 1.1.2022.

Lim, K. Wild boar in Yishun incident euthanised as 'last resort', NParks says. 3.26.2022. TODAY. Available

online:

<https://www.todayonline.com/singapore/wild-boar-yishun-incident-euthanised-last-resort-nparks-says-1855426> Accessed on 3.27.2022.

Little, S. & Agahi, E. Vancouver woman mauled by raccoons says officials won't do anything about it. 7.28.2021. Global News.

Available online: <https://globalnews.ca/news/8068842/vancouver-woman-mauled-by-raccoons/> Accessed on 8.1.2021.

Lopes, M. Otters are taking over Singapore. 10.22.2021. The Washington Post. Available online: [https://www.washingtonpost.com/world/asia\\_pacific/singapore-otters-wildlife/2021/10/22/9e85c3ac-2afd-11ec-b17d-985c186de338\\_story.html](https://www.washingtonpost.com/world/asia_pacific/singapore-otters-wildlife/2021/10/22/9e85c3ac-2afd-11ec-b17d-985c186de338_story.html) Accessed on 10.25.2021.

Lundy, J. Back-to-back rabid raccoon attacks in Kinston, residents and health leaders react. 2.4.2022. WITN. Available online:

<https://www.witn.com/2022/02/05/back-to-back-rabid-raccoon-attacks-kinston-residents-health-leaders-react/> Accessed on 2.5.2022.

Lupkat, A. A California City Is Overrun by Crows. Could a Laser Be the Answer? 1.17.2022. The New York Times. Available

online: <https://www.nytimes.com/2022/01/17/us/sunnyvale-california-crows-lasers.html> Accessed on 1.18.2022.

MacLean, H. 'Instinctive': Sea lion incident at Dunedin's St Clair beach sparks discussion. Otago Daily Times. Available online:

<https://www.newstalkzb.co.nz/news/national/sea-lion-incident-at-dunedins-st-clair-beach-sparks-discussion/>

Makin, S. Tel Aviv's Central Shopping Mall Is Now an Amusement Park for Environmentalists. 12.29.2021. Haaretz. Available

online: <https://www.haaretz.com/israel-news/.premium.MAGAZINE-tel-aviv-s-main-shopping-mall-has-become-an-amusement-park-for-environmentalists-1.10501307> Accessed on 1.1.2022.

Marnin, J. Woman hanging Christmas lights fends off attacking raccoon. 'Thought I was going to die' 12.8.2021. Miami Herald. Available online: <https://www.miamiherald.com/news/nation-world/national/article256425556.html#storylink=cpy> Accessed on 12.9.2021.

Marshal A. Akron will mind its own beeswax, allow gardeners to cultivate pollinator-friendly plants. 3.23.2022. Akron Beacon

Journal. Available online: <https://www.yahoo.com/news/akron-mind-own-beeswax-allow-100130823.html> Accessed on 3.25.2022.

Martin J. Gardening: Deceptively beautiful Bradford pear tree grows into an invasive nuisance. 3.11.2022. AP. Available online:

<https://www.yahoo.com/news/rattlesnake-roundups-2-paths-drawing-061437780.html> Accessed on 3.15.2022.

Martinez, C. A feud between mail carriers, wild turkeys comes to a deadly climax near Sacramento. 3.5.2022. Los Angeles Times.

Available online: <https://www.yahoo.com/news/feud-between-mail-carriers-wild-143009007.html> Accessed on 3.8.2022.

Matthews, D. The wild frontier of animal welfare. 4.21.2021. Vox. Available online: <https://www.vox.com/the-high-light/22325435/animal-welfare-wild-animals-movement> Accessed on 4.25.2021.

McCay T. M. Florida Swim Team Receives Surprise Visit from Alligator During Practice. 3.21.2022. Southern Living. Available online: <https://www.yahoo.com/lifestyle/florida-swim-team-receives-surprise-164044504.html> Accessed on 3.25.2022.

McCay, T.M. Louisiana Deputy Attacked by Pet Squirrel During Traffic Stop. 3.8.2022. Southern Living. Available online: <https://www.yahoo.com/lifestyle/louisiana-deputy-attacked-pet-squirrel-180021934.html> Accessed on 3.10.2022.

McClenny, B. 'It's a show stopper': One-in-a-million picturesque yellow cardinal spotted in Florida. 3.10.2022. USA Today. Available online: <https://www.yahoo.com/news/show-stopper-one-million-picturesque-155320094.html> Accessed on 3.11.2022.

McNulty, M. And you thought mice were bad! Horrifying moment 'RABID' RACCOON tries to claw its way into terrified fashion student's NYC apartment through kitchen light fixture. 3.5.2022. Daily Mail. Available online: <https://www.dailymail.co.uk/news/article-10580923/Horrifying-moment-RABID-raccoon-tries-claw-way-terrified-students-Brooklyn-apartment.html> Accessed on 3.10.2022.

Meyers, E. Wild turkeys are Michigan's comeback kids. 12.23.2021. Fox 47 News. Available online: <https://www.fox47news.com/news/local-news/wild-turkeys-are-michigans-comeback-kids> Accessed on 12.27.2021.

Miller, J. Second wolverine sighting likely 'transient' creature. 7.3.2021. The Salt Lake Tribune. Available online: <https://www.sltrib.com/news/2021/07/03/second-wolverine-sighting/> Accessed on 7.10.2021.

Milman, O. 'It was angry, vicious': spate of squirrel attacks leave NYC neighborhood in fear. 1.8.2021. The Guardian. Available online: <https://www.theguardian.com/world/2021/jan/08/squirrel-attacks-nyc-neighborhood-fear> Accessed on 1.9.2021.

Milman, O. 'It's like hunting aliens': inside the town besieged by armadillos. 11.15.2021. The Guardian. Available online: <https://www.theguardian.com/environment/2021/nov/15/its-like-hunting-aliens-inside-the-town-besieged-by-armadillos> Accessed on 11.17.2022.

New Day Northwest, Addrissi, A. & Wafai, A. How to coexist with wildlife in urban and suburban areas. 7.28.2021. King5. Available online: <https://www.king5.com/article/entertainment/television/programs/new-day-northwest/coexist-wildlife-urban-suburban-racoons-coyotes/281-eb66aa7e-4a55-4537-92f6-34fd33bc3801> Accessed on 7.29.2021.

O'Brien, C. Toronto Says Raccoon Attacks Are Happening Way More Right Now & People Need To Be Careful. 3.2.2021. Narcity.

Available online: <https://www.narcity.com/toronto/raccoons-in-toronto-caused-60-more-reported-attacks-in-2021#toggle-gdpr%20>

Accessed on 3.5.2021.

O'Connel, P. M., Cherney, E. & Anderson, J. Thousands of coyotes live in the Chicago area. But attacks on people, like the one that

left a young boy injured, are extremely rare. 1.9.2022. Chicago Tribune. Available online: <https://www.chicagotribune.com/news/environment/ct-coyotes-chicago-20200109-n5tubflfjqj5jb5fm246xhniuy-story.html> Accessed on 1.10.2022.

Pallone, G. Concerns over feeding wild animals at Palm Bay sanctuary. 3.30.2022. Spectrum News 13. Available online:

<https://www.mynews13.com/fl/orlando/ap-florida-news/2022/03/30/concerns-over-feeding-wild-animals-at-palm-bay-sanctuary?web=1&wdLOR=cD05226C1-2D4E-B947-8B04-0B4EEE831A6C> Accessed on 4.2.2022.

Passifiume, B. Peterborough police ask residents stop shooting squirrels with arrows. 1.11.2022. Toronto Sun. Available online:

<https://torontosun.com/news/provincial/peterborough-police-ask-residents-stop-shooting-squirrels-with-arrows> Accessed on

1.12.2022.

Patton, D. This once beloved tree, seen all over the KC area, is now considered a major pest. 3.25.2022. The Kansas City Star. Available online: <https://www.yahoo.com/news/once-beloved-tree-seen-over-100000474.html> Accessed on 3.28.2022.

Perry, J. Free trees again offered to Rhode Island residents through energy-saving program. 3.24.2022. The Providence Journal.

Available online: <https://www.yahoo.com/news/free-trees-again-offered-rhode-140814173.html> Accessed on 3.25.2022.

Poole, S. Squirrels in Bienville Square to be relocated. 1.3.2022. WKRG. Available at: <https://www.wkrg.com/mobile-county/squirrels-in-bienville-square-to-be-relocated/> Accessed on 1.5.2022.

Porter, M. Mountain Lion euthanized in Deer Valley neighborhood due to threat of public safety. 9.8.2021. FOX 13 Salt Lake City.

Available online: <https://www.fox13now.com/news/local-news/mountain-lion-euthanized-in-deer-valley-neighborhood-due-to-threat-of-public-safety> Accessed on 9.10.2021.

Press Herald. Mama bear, 3 cubs climb tree, take nap in urban Virginia. 12.28.2021. Available online: <https://www.pressherald.com/2021/12/28/mama-bear-3-cubs-climb-tree-take-nap-in-urban-virginia/> Accessed on 12.30.2021.

Price, M. 6-foot alligator found lurking under family's car in middle of night, Florida cops say. 11.9.2021. Bellingham Herald. Available online at: <https://www.bellinghamherald.com/news/nation-world/national/article255664231.html> Accessed on 11.15.2021.

Price, M. 5-foot invasive snake found living in man's newly purchased sofa, Florida cops say. 12.7.2021. Bellingham Herald. Available online: <https://www.bellinghamherald.com/news/nation-world/national/article256397186.html> Accessed on 12.10.2021.

Price, M. An alligator in Canada? Weird find in ditch included 5 big snakes — all dead, cops say. 12.30.2021. Bellingham Herald. Available online: <https://www.bellinghamherald.com/news/nation-world/article256940417.html> Accessed on 1.3.2022.

Price, M. 'Giant snapping turtle' prompts 911 calls in Pennsylvania. It's not a native species. 12.13.2021. Centre Daily. Available online: <https://www.centredaily.com/news/state/pennsylvania/article256545761.html> Accessed on 12.15.2022.

Price, M. Timber rattlesnake hitchhiked across nation and got stuck in Arizona, expert says. 12.13.2021. San Luis Obispo. Available online: <https://www.sanluisobispo.com/news/nation-world/national/article256547331.html> Accessed on 12.15.2022.

Price, M. Hawk attacks and eats invasive lizard at Florida golf course, thrilling social media. 3.22.2022. Miami Herald. Available online: <https://www.yahoo.com/news/hawk-attacks-eats-invasive-lizard-111655239.html> Accessed on 3.25.2022.

Quansah, L. Coyote at large after biting two people in North York park, city says. 11.21.2021. Toronto Star. Available online: <https://www.thestar.com/news/gta/2021/11/21/coyote-at-large-after-biting-two-people-in-north-york-park-city-says.html> Accessed on 11.25.2021.

Querry-Thompson, K. First case of avian influenza detected in Oklahoma. 3.31.2022. Oklahoma News 4. Available online: <https://kfor.com/news/local/first-case-of-avian-influenza-detected-in-oklahoma/> Accessed on 4.5.2022.

Rafford, C. Forget giant spiders, Indiana has a new invasive species and its stings 'hurt like crazy'. 3.11.2022. The Indianapolis Star. Available online: <https://www.yahoo.com/news/forget-giant-spiders-indiana-invasive-203050231.html> Accessed on 3.15.2022.

Ramirez Jr., D. Cobra owner in Grand Prairie arrested; venomous snake still missing in neighborhood. 2.11.2022. The Fort Worth

Star Telegram. Available online:  
<https://www.yahoo.com/news/cobra-owner-grand-prairie-arrested-181749426.html> Accessed on 2.15.2022.

Ramirez Jr., D. Cobra escaped from homemade cage with no locks in Grand Prairie home, affidavit says. 2.21.2022. The Fort Worth

Star Telegram. Available online:  
<https://www.yahoo.com/news/cobra-escaped-homemade-cage-no-192205837.html> Accessed on 3.1.2022.

Reindl, JC. Son of animal hoarder drops off nearly 500 parakeets at animal shelter before Christmas. 12.25.2021. Detroit Free Press.

Available online:  
<https://www.freep.com/story/news/local/michigan/2021/12/25/500-parakeets-animal-shelter-christmas/9017167002/> Accessed on 12.27.2022.

Reuters. Bald eagle lays two eggs in Washington's National Arboretum. 2.25.2022. Available online: <https://www.yahoo.com/news/bald-eagle-lays-two-eggs-204522409.html> Accessed on 2.27.2022.

Reuters. Birds are laying eggs earlier as springs shift. 3.25.2022. Available online: <https://www.yahoo.com/news/birds-laying-eggs-earlier-springs-180038480.html> Accessed on 3.26.2022.

Richardson, H. This wild African cat has adapted to life in a big city surprisingly well. 11.11.2021. National Geographic. Available

online:  
<https://www.nationalgeographic.co.uk/animals/2021/11/this-wild-african-cat-has-adapted-to-life-in-a-big-city-surprisingly-well> Accessed on 11.15.2021.

Rieger, S. 3 more hurt in coyote attacks in northwest Calgary, days after aggressive coyote killed nearby. 6.27.2021. CBC. Available

online: <https://www.cbc.ca/news/canada/calgary/coyote-attacks-calgary-1.6082501> Accessed on 6.29.2021.

Ryan, E. New Yorkers and wildlife are finding solace in the city's parks. 12.23.2021. CNN. Available online: <https://www.cnn.com/2021/12/21/us/new-york-wildlife-surge/index.html> Accessed on 12.27.2021.

Rosenthal, Z. Tremendous swarm of bugs crawls across the Outback. 3.21.2022. AccuWeather. Available online:  
<https://www.yahoo.com/news/tremendous-swarm-bugs-crawls-across-201554240.html> Accessed on 3.25.2022.

Rutgard, O. 'Grotesque' video of fox being stabbed with garden fork sparks outrage. 12.25.2021. The Telegraph. Available online:

<https://www.telegraph.co.uk/news/2021/12/25/grotesque-video-fox-stabbed-garden-fork-sparks-outrage/> Accessed on 12.27.2021.

Ruth, D. Turkey causing traffic headaches in Westchase, FWC says no plans for removal. 12.17.2021. WFLA. Available online:

<https://www.wfla.com/news/hillsborough-county/turkey-causing-traffic-headaches-in-westchase-fwc-says-no-plans-for-removal/>

Accessed on 12.18.2021.

Saad, N. Shakira and son survive attack by wild boars in Barcelona. Her handbag did not. 9.30.2021. Los Angeles Times. Available

online:

<https://www.latimes.com/entertainment-arts/music/story/2021-09-30/shakira-wild-boars-handbag-barcelona> Accessed on

10.2.2021.

Salazar, A. Squirrels found to have humanlike personality traits. 3.4.2022. The Ticker. Available online:

<https://theticker.org/6288/science/squirrels-found-to-have-humanlike-personality-traits/> Accessed on 3.5.2022.

Salgado, C. Smartphones capture wildlife snapshots during BioBlitz at CSU Channel Islands. 2.20.2022. Ventura County Star. Available online:

<https://www.yahoo.com/news/smartphones-capture-wildlife-snapshots-during-150012903.html>

Accessed on 2.22.2022.

Seeneen, M. 'Conflict within conflict': Wild animal attacks rise in Kashmir. 6.29.2021. Al Jazeera. Available online:

<https://www.aljazeera.com/news/2021/6/29/conflict-within-conflict-kashmir-sees-rise-in-man-wild-clashes> Accessed on 6.30.2021.

Seipel, B. Raccoon that 'attacked' news crews on White House lawn sparks viral jokes. 9.28.2021. The Hill. Available online:

<https://thehill.com/homenews/media/518618-raccoon-that-attacked-news-crews-on-white-house-lawn-sparks-viral-jokes/> Accessed on 10.2.2021.

Shah, S. Animals That Infect Humans Are Scary. It's Worse When We Infect Them Back. 1.19.2022. The New York Times. Available

online: <https://www.nytimes.com/2022/01/19/magazine/spillback-animal-disease.html> Accessed on 1.20.2022.

Shenfeld, H. Abandoned Pet Bunnies Overrunning Florida Neighborhood: 'They're Everywhere You Look' 3.23.2022. People. Available online:

<https://www.yahoo.com/entertainment/abandoned-pet-bunnies-overrunning-florida-190327423.html> Accessed

on 3.25.2022.

Silber, A. Year In Review: 'Coexisting In Harmony' Series Helped Residents Share Newtown With Wildlife. 12.31.2021. Newtown

Bee.

Available

online:

<https://www.newtownbee.com/12312021/year-in-review-coexisting-in-harmony-series-helped-residents-share-newtown-with-wildlife/> Accessed on 1.2.2022.



Siegrist, J. Purple Martins return to Illinois with spring close behind. 3.13.2022. Star Courier. Available online: <https://www.yahoo.com/news/purple-martins-return-illinois-spring-120026197.html> Accessed on 3.15.2022.

Simeral, C. & Healy, M. Sea lion wanders onto San Diego highway. 1.7.2022. Fox 5 San Diego. Available online: <https://fox5sandiego.com/news/local-news/sea-lion-rescued-from-san-diego-highway/> Accessed on 1.8.2022.

Singh, M. Rowdy rafter of turkeys wreak havoc at Nasa's Silicon Valley campus. 2.9.2022. The Guardian. Available online: <https://www.yahoo.com/news/rowdy-rafter-turkeys-wreak-havoc-204459581.html> Accessed on 2.10.2022.

Skinner, R. H. Town's latest native plant requirement has harvested concerns, support from garden experts. 2.28.2022. Palm Beach. Available online: <https://www.palmbeachdailynews.com/story/news/2022/02/28/towns-latest-native-plant-requirement-has-harvested-concerns-support-garden-experts/9300233002/> Accessed on 3.1.2022.

Smith, M. As Turkeys Take Over Campus, Some Colleges Are More Thankful Than Others. 11.25.2021. The New York Times. Available online: <https://www.nytimes.com/2021/11/25/us/turkey-college-campus.html> Accessed on 11.29.2021.

Smith, P.A. Platteville fish dealer convicted of selling invasive carp. 3.23.2022. Milwaukee Journal Sentinel. Available online: <https://www.yahoo.com/news/platteville-fish-dealer-convicted-selling-232539737.html> Accessed on 3.25.2022.

Smith, P.A. The snowy owl found in Milwaukee covered in oil has been successfully returned to the wild. 3.8.2022. Milwaukee Journal Sentinel. Available online: <https://www.yahoo.com/news/snowy-owl-found-milwaukee-covered-201427026.html> Accessed on 3.15.2022.

Sparks, H. Distressed woman tells cops a possum is holding her 'hostage' at home. 11.15.2021. NY Post. Available online: <https://nypost.com/2021/11/15/woman-calls-cops-says-possum-holding-her-hostage-at-home/> Accessed on 11.20.2021.

Swiercz, G. 'They bite hard!': Humane Society warns South Bend area residents to avoid Canada geese. 3.30.2022. South Bend Tribune. Available online: <https://www.southbendtribune.com/story/news/local/2022/03/30/south-bend-st-joseph-county-humane-society-warns-canada-geese-attacks/7202454001/> Accessed on 4.1.2022.

The Columbus Dispatch Native Plant: Incredibly hardy marsh marigolds thrive in heavy moisture. 3.13.2022. Available online:

<https://www.yahoo.com/news/native-plant-incredibly-hardy-marsh-103951440.html> Accessed on 3.15.2022.

The Global Herald. From vermin to viral: The raccoon with almost 12k Instagram followers. 2.7.2022. Available online: <https://theglobalherald.com/news/from-vermin-to-viral-the-raccoon-with-almost-12k-instagram-followers/> Accessed on 2.15.2022.

The Guardian. Hong Kong begins hunting wild boar amid public safety fears. 11.18.2021. Available online: <https://www.theguardian.com/world/2021/nov/18/hong-kong-begins-hunting-wild-boar-amid-public-safety-fears> Accessed on 11.19.2021.

The Hill. Activists praise first rattlesnake roundup free of catching, killing. 3.11.2022. Available online: <https://www.yahoo.com/news/activists-praise-first-rattlesnake-roundup-183002046.html> Accessed on 3.15.2022.

The Hill. Invasive insects could kill 1.4M urban trees over the next 30 years, study says. 3.14.2022. Available online: <https://www.yahoo.com/news/invasive-insects-could-kill-1-143903156.html> Accessed on 3.15.2022.

The Palm Beach Post. Rabid raccoon bit person in suburban Boca Raton, health officials say. 12.3.21. Available online: <https://www.cbc.ca/news/canada/calgary/coyote-attacks-calgary-1.6082501> Accessed on 12.6.2021.

The State. 6 invasive species that have wreaked havoc in South Carolina. Here's what to know. 3.11.2022. Available online: <https://www.yahoo.com/news/6-invasive-species-wreaked-havoc-110000165.html> Accessed on 3.15.2022.

Thorn, D. Wildlife warnings over mountain lions and coyotes in Bay Area. 1.19.2022. KRON 4 San Francisco. Available online: <https://www.kron4.com/news/bay-area/belmont-police-warn-of-aggressive-mountain-lion/> Accessed on 1.20.2022.

Thornton, W. Aggressive raccoon exposes 3 people to rabies in Cullman County. 7.30.2021. Al.com. Available online: <https://www.al.com/news/2021/07/aggressive-raccoon-exposes-3-people-to-rabies-in-cullman-county.html> Accessed on 8.15.2021.

Tri City Herald. Into the wild: Animals the latest frontier in COVID fight. 3.31.2021. Available online: <https://www.tri-cityherald.com/news/business/health-care/article259926760.html> Accessed on 4.1.2021.

VC Star. Bear takes a stroll through Southern California neighborhood. 2.21.2020. Available online: <https://www.vcstar.com/story/news/local/2020/02/21/bear-takes-stroll-through-southern-california-neighborhood/4831241002/> Accessed on 6.10.2021.

Volc, W. The call of the wild: Local wildlife popping up in urban areas. 12.8.2021. WRDW. Available online:

<https://www.wrdw.com/2021/12/09/call-wild-local-wildlife-popping-up-urban-areas/> Accessed on 1.4.2022.

Warakapitiya, K. Crafty, nocturnal ninja running wild in city homes. 12.12.2021. Sunday Times. Available online:

<https://www.sundaytimes.lk/211212/news/crafty-nocturnal-ninja-running-wild-in-city-homes-464960.html> Accessed on 1.3.2022.

Welsh, D. Shakira Fends Off Wild Boars After Being Targeted In Barcelona Park. 30.9.2021. HuffPost. Available online:

[https://www.huffingtonpost.co.uk/entry/shakira-wild-boars-barcelona-handbag\\_uk\\_615588e3e4b05025422f1f19](https://www.huffingtonpost.co.uk/entry/shakira-wild-boars-barcelona-handbag_uk_615588e3e4b05025422f1f19) Accessed on 10.10.2021.

White, R. Ukraine Zoo Animals Evacuated to Poland After Getting Surrounded by Russian Tanks. 3.1.2022. Newsweek. Available

online: <https://www.newsweek.com/ukraine-zoo-animals-evacuated-1683672> Accessed on 3.4.2022.

Willetts, M. Report of gun-toting bear sent wildlife officers scouring through Minnesota wilderness. 7.14.2021. The Kansas City

Star. Available online: <https://www.kansascity.com/news/nation-world/national/article252778233.html> Accessed on 8.10.2022.

Willetts, M. Alligators to be removed from Texas neighborhood after dog is killed, officials say. 12.19.2021. Fort Worth Star Telegram. Available online:

<https://www.star-telegram.com/news/state/texas/article256718382.html> Accessed on 1.2.2022.

Worral, S. Gardening: How to create a wildlife-boosting hedge - even in an urban garden. 11.10.2021. National Geographic. Available

online: <https://www.nationalgeographic.com/animals/article/wild-parakeets-far-from-their-native-l-and-have-taken-a-liking-to-london> Accessed on 12.15.2021.

Wildlife SOS. Monkeys in the City: The Urban Wildlife Syndrome and the Challenges of Growing Conflict. 2.3.2022. The Weather

Channel. Available online: <https://weather.com/en-IN/india/biodiversity/news/2022-02-03-the-urban-wildlife-syndrome-and-the-challenges-of-growing> Accessed on 2.10.2022.

Windham D. & Murray, G. 'Herds' of hungry seagulls are tormenting people after 'feasting on flying ants'. 7.30.2021. Mirror. Available online:

<https://www.mirror.co.uk/news/uk-news/herds-hungry-seagulls-tormenting-people-24652211> Accessed on 8.15.2021.

Wong, A. How Sasha the Cougar Was Rescued From a Bronx Home. 8.31.2021. The New York Times. Available online:

<https://www.nytimes.com/2021/08/31/nyregion/cougar-sasha-rescued-bronx.html> Accessed on 9.2.2021.

Wong, W. Wild video shows Florida transplant trapping alligator his 'ownway' — in a garbage bin. 9.30.2021. NBC News. Available online: <https://www.nbcnews.com/news/us-news/wild-video-shows-fl%20orida-transplant-trapping-alligator-his-own-way-n1280419> Accessed on 10.2.2021.

Woody, T. Meet the New Climate Refugee in Town: Coyotes. 12.6.2021. Bloomberg. Available online: <https://www.bloomberg.com/news/features/2021-12-06/how-climate-change-forces-wildlife-into-cities> Accessed on 1.3.2022.

Worral, S. Wild parakeets, far from their native land, have taken a liking to London. 11.10.2021. National Geographic. Available online: <https://www.nationalgeographic.com/animals/article/wild-parakeets-far-from-their-native-land-have-taken-a-liking-to-london> Accessed on 11.15.2021.

Zim, L. WATCH: Ticked Off Turkeys Are Attacking Delivery Drivers in One Wisconsin Town. 3.23.2022. Q98.5. Available online: <https://q985online.com/watch-ticked-off-turkeys-are-attacking-delivery-drivers-in-one-wisconsin-town/> Accessed on 3.25.2022.

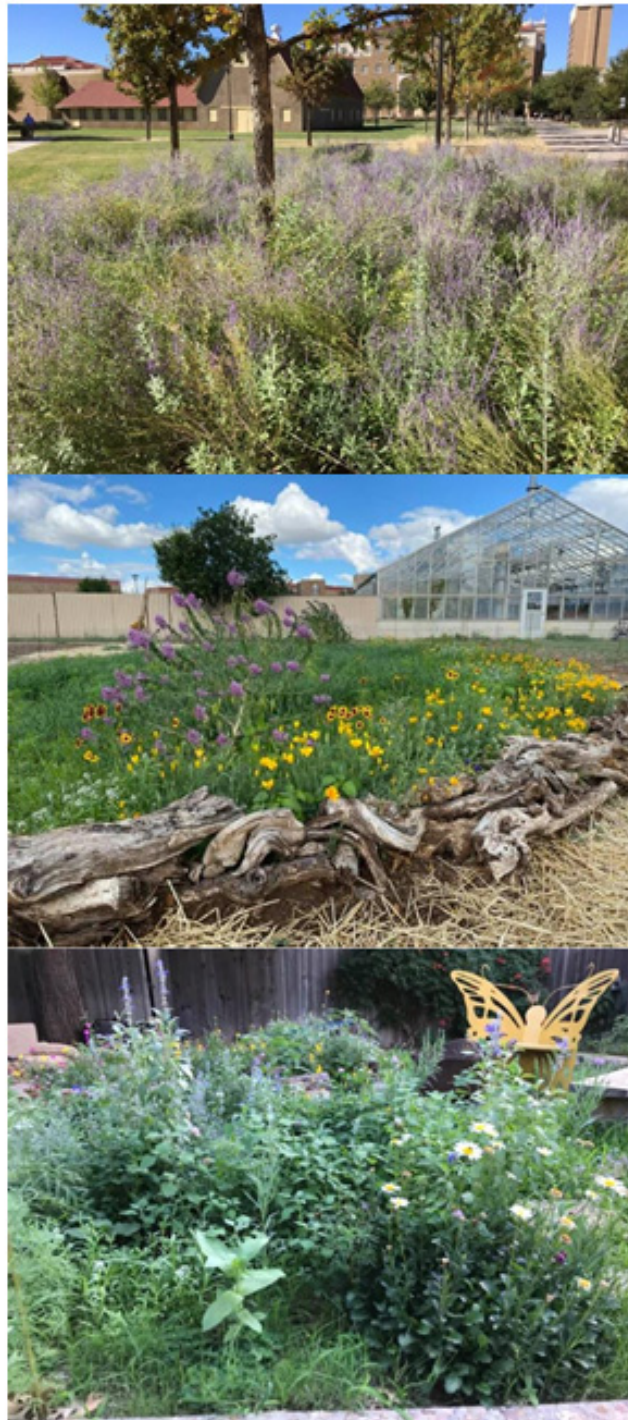

**Figure S1.** Three pollinator-oriented flower gardens from Lubbock, Texas. Top: Russian sage (*Salvia yangii*) established as part of the grounds of Texas Tech University in Lubbock, Texas, USA. Middle: Pollinator habitat established at the Texas Tech University Horticultural Gardens and Greenhouse. Bottom: A residential pollinator garden in Lubbock. Such gardens often primarily incorporate native species and other hardy taxa that require reduced care compared to traditional horticultural choices. Even a relatively small garden can enhance urban invertebrate biodiversity. Photos by Scott Longing.
